# Supplementary material
Source: PubMed Central journal article supplement (PMC5360515)
Supplement: NIHMS845400-supplement-1.pdf [file NIHMS845400-supplement-1.pdf]

## SUPPLEMENTAL MATERIAL

| Supplementary Table 1: qPCR primers |                            |
|-------------------------------------|----------------------------|
| 18S F                               | CGCGGTTCTATTTTGTGGT        |
| 18S R                               | AGTCGGCATCGTTTATGGTC       |
| $\beta$ actin F                     | TCATCACTATTGGCAACGAGCGGTTC |
| $\beta$ actin R                     | TACCACCAGACAGCACTGTGTTGGCA |
| CD19 F                              | ACCAGTACGGGAATGTGCTC       |
| cD19 R                              | TTCATAGGCCTCCCCTTCTT       |
| Gadd45 $\alpha$ F                   | CCGAAAGGATGGACACGGTG       |
| Gadd45 $\alpha$ R                   | TTATCGGGGTCTACGTTGAGC      |
| Hprt F                              | CTGGTGAAAAGGACCTCTCG       |
| Hprt R                              | TGAAGTACTCATTGTAGTCAAGGGCA |
| Lck F                               | CCTTCGGGATCTTGCTTACA       |
| Lck R                               | GTTGTCAGGTCTCACCATGC       |
| p21 F                               | GACATTCAGAGCCACAGGCAC      |
| p21 R                               | GTCAAAGTCCACCGTTCTCG       |
| Rag1 F                              | TGGGAATCGTTTCAAGAGTGAC     |
| Rag1 R                              | CATCTGCCTTCACGTCGATCC      |
| Rag2 F                              | ACACCAAACAATGAGCTTTCCG     |
| Rag2 R                              | CCGTATCTGGGTTCAAGGAC       |
| Wasp F                              | GCTCCCTCCTACTCCAGTGTC      |
| Wasp R                              | AGGGCACCTACTAGGCCTTC       |

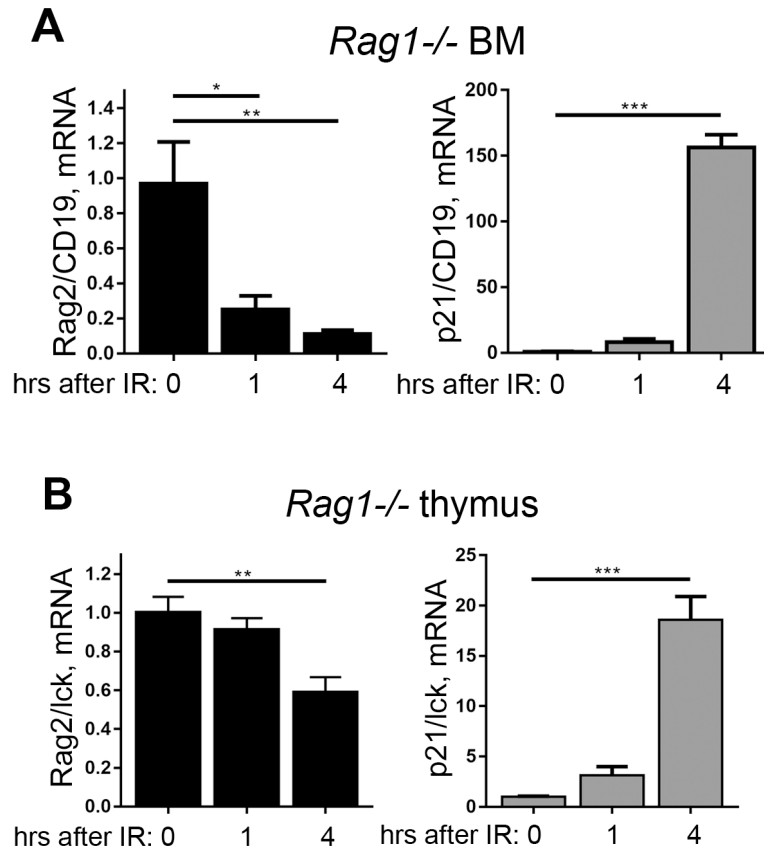

**SUPPLEMENTAL FIGURE 1.** Pro-B and pro-T cells suppress *Rag2* expression in response to ionizing radiation. (A-B) qRT-PCR quantification of *Rag2* and *p21* mRNA in BM (A) or thymuses (B) from non-irradiated *Rag1*<sup>-/-</sup> mice or *Rag1*<sup>-/-</sup> mice at indicated times after exposure to 10 Gy IR. Data in each graph are from 3 or more independent experiments with a total of 4-6 mice per timepoint. Data averages are shown with error bars indicating SEM. p-values calculated using Dunnett's post-test after ANOVA. \*p<0.05, \*\*p<0.01, \*\*\*p<0.001.

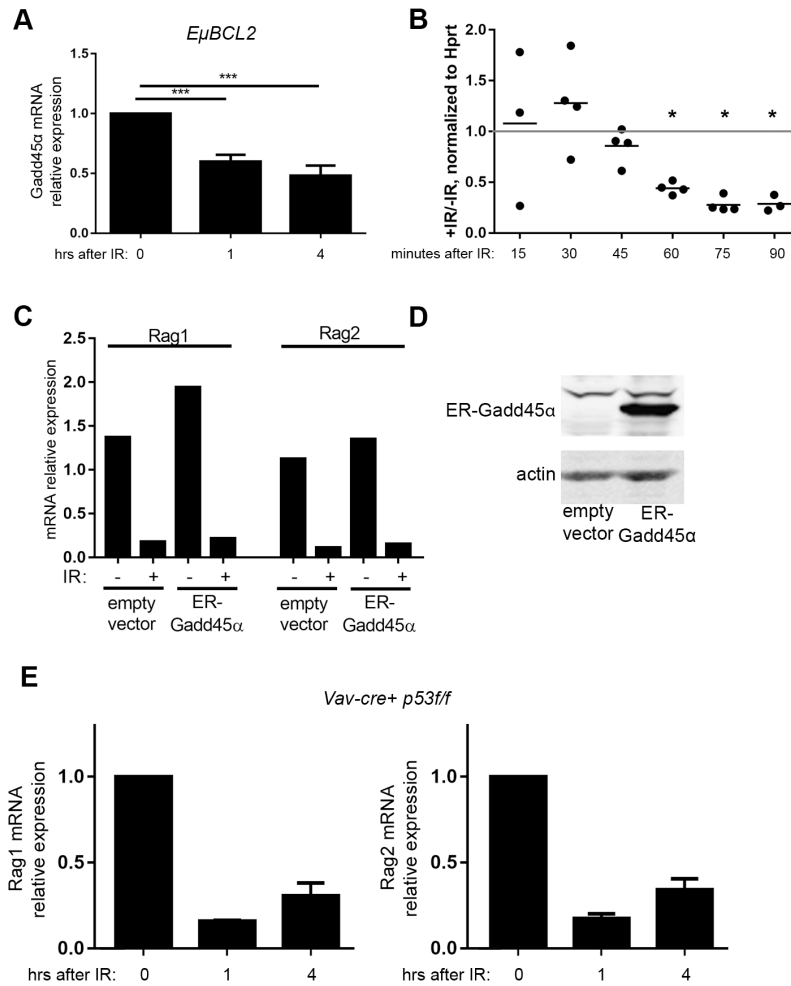

**SUPPLEMENTAL FIGURE 2.** Neither p53 activity nor downregulation of Gadd45α mRNA levels is required for suppression of *Rag1* and *Rag2* transcription in response to IR. **(A)** qRT-PCR quantification of Gadd45α mRNA in non-irradiated *EμBCL2* pre-B cells or irradiated *EμBCL2* pre-B cells at indicated times after exposure to 4 Gy IR. Data are from 11 independent experiments. Data are normalized to 1.0 for non-irradiated cells. For irradiated cells, data averages are shown with error bars indicating SEM. p-values calculated using Dunnett's post-test after ANOVA. \*\*\*p<0.001. **(B)** qRT-PCR quantification of EU-labeled Gadd45α mRNA levels relative to EU-labeled Hprt mRNA levels in non-irradiated *EμBCL2* pre-B cells and irradiated *EμBCL2* pre-B cells at indicated times after addition of EU and exposure to 4 Gy of IR. Data are presented as the ratio of relative levels of each mRNA in irradiated cells compared to non-irradiated cells. The dotted line represents a value of 1, which would indicate that IR had no effect on the transcription rate of an assayed gene. Data are from 4 independent experiments. p-values were determined using one-tailed T test with Bonferroni's correction for multiple testing. \*\*\*p<0.001. **(C)** qRT-PCR quantification of *Rag1* and *Rag2* mRNA in non-irradiated and irradiated *Rag1<sup>D708A</sup>* Abl pre-B cells transduced with an empty retroviral vector or the same retroviral vector containing an ER-Gadd45α cDNA. For 2 hours before harvesting non-irradiated cells or exposing to IR the irradiated cells, all cells were treated with tamoxifen to induce nuclear translocation of ER-Gadd45α. Data are from one representative experiment. **(D)** Western blot showing ER-Gadd45α and actin expression in *Rag1<sup>D708A</sup>* Abl pre-B cells transduced with an empty retroviral vector or the same retroviral vector containing an ER-Gadd45α cDNA. Data are from one representative experiment. **(E)** qRT-PCR quantification of *Rag1* and *Rag2* mRNA in non-irradiated *VavCre<sup>+</sup>Tp53<sup>fl/fl</sup>* pre-B cells or irradiated *VavCre<sup>+</sup>Tp53<sup>fl/fl</sup>* pre-B cells at indicated times after exposure to 4 Gy IR. Data are from 2 independent experiments. Data are normalized to 1.0 for non-irradiated cells harvested one hour following IR exposure of irradiated samples. For other samples, data averages are shown with error bars indicating SEM.

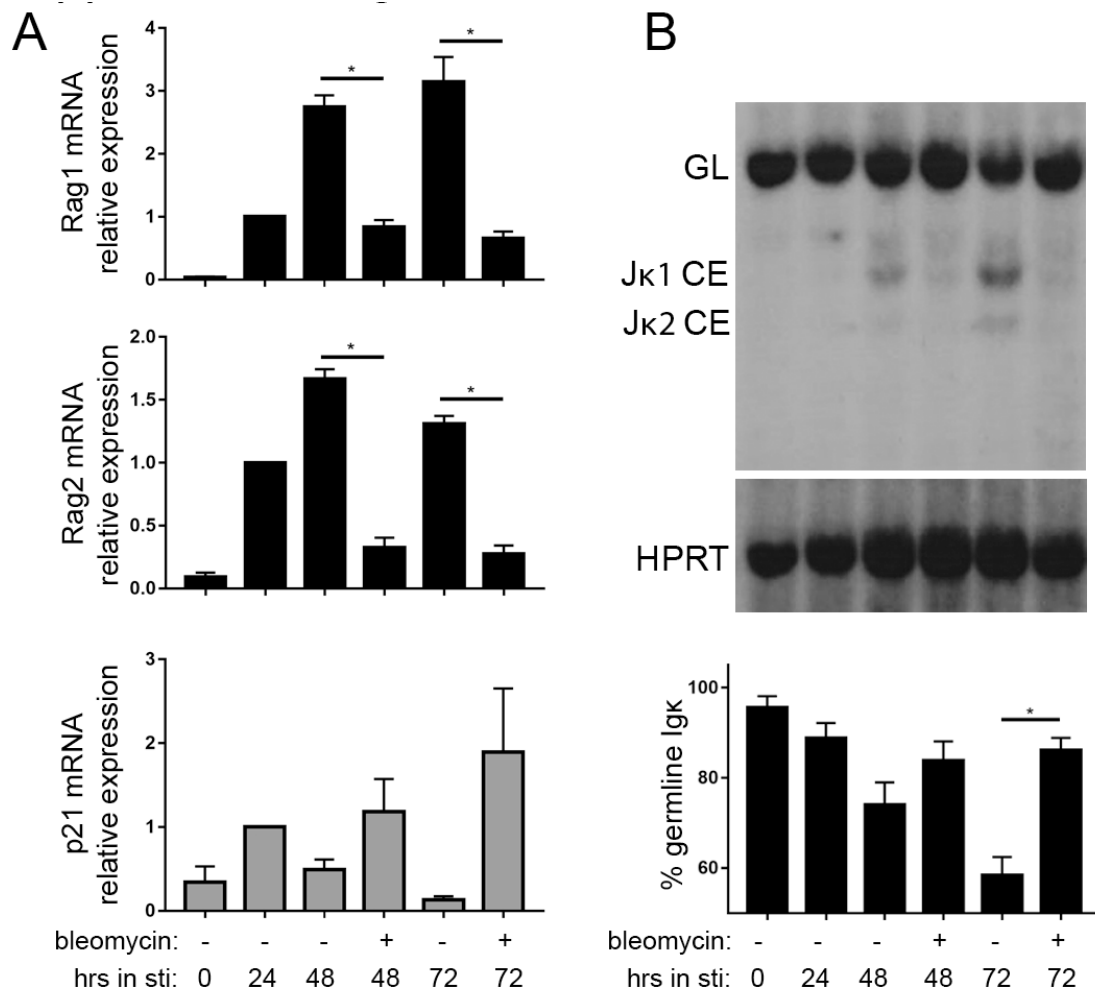

**SUPPLEMENTAL FIGURE 3.** Bleomycin treatment inhibits recombination of endogenous *Igκ* loci. (A) qRT-PCR quantification of Rag1, Rag2, and p21 mRNA in *Artemis<sup>-/-</sup>EμBCL2* Abl cells untreated or treated with STI571 or STI571 and bleomycin for the indicated amounts of time. Data are from 6 independent experiments. (B) Representative Southern blot analysis and graphical quantification of *Jκ* cleavage in *Artemis<sup>-/-</sup>EμBCL2* Abl cells untreated or treated with STI571 or STI571 and bleomycin for the indicated amounts of time. Data are from 3 independent experiments.
